# Supplementary material
Source: publisher site journal article supplement (https://www.kjim.org/upload/media/kjim-2023-350-Supplementary-Fig-2.pdf)
Supplement: Supplementary file 1 [file kjim-2023-350-Supplementary-Fig-2.pdf]

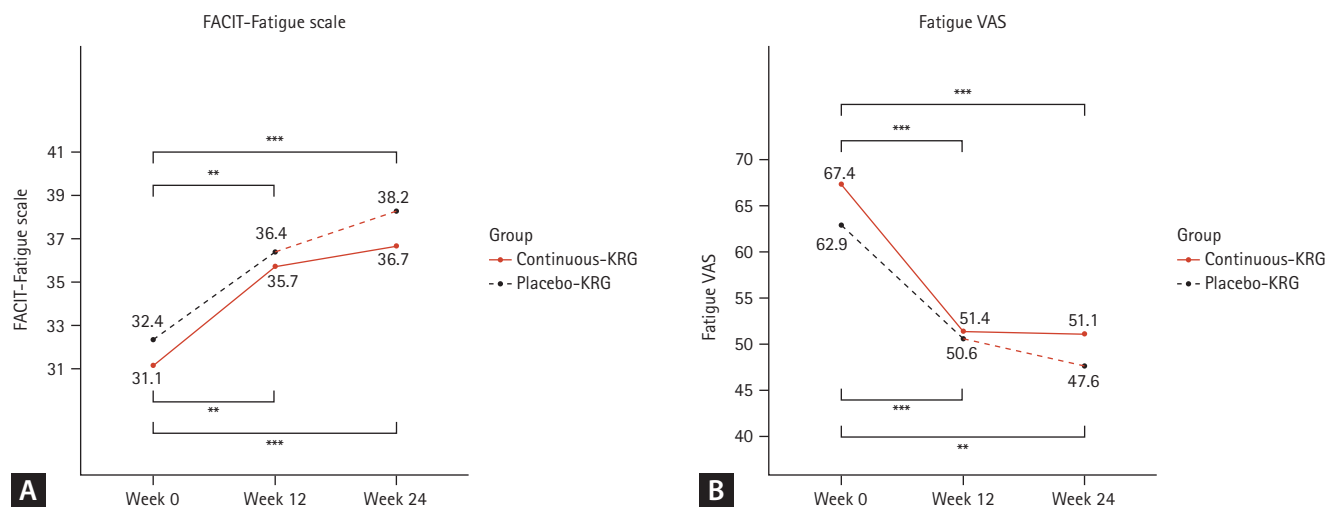

**Supplementary Figure 2.** Change in Fatigue between KRG and placebo groups. (A) Fatigue change based on FACIT-Fatigue scale. (B) Fatigue change based on Fatigue VAS. KRG, Korean Red Ginseng; FACIT-Fatigue, The Functional Assessment of Chronic Illness-Fatigue; VAS, visual analog scale. \*\* for  $p < 0.01$ ; \*\*\* for  $p < 0.001$ .
